# Supplementary material
Source: PubMed Central journal article supplement (PMC3150906)
Supplement: 1104978108_pnas.1104978108_SI.pdf [file 1104978108_pnas.1104978108_SI.pdf]

# Supporting Information

Cole et al. 10.1073/pnas.1104978108

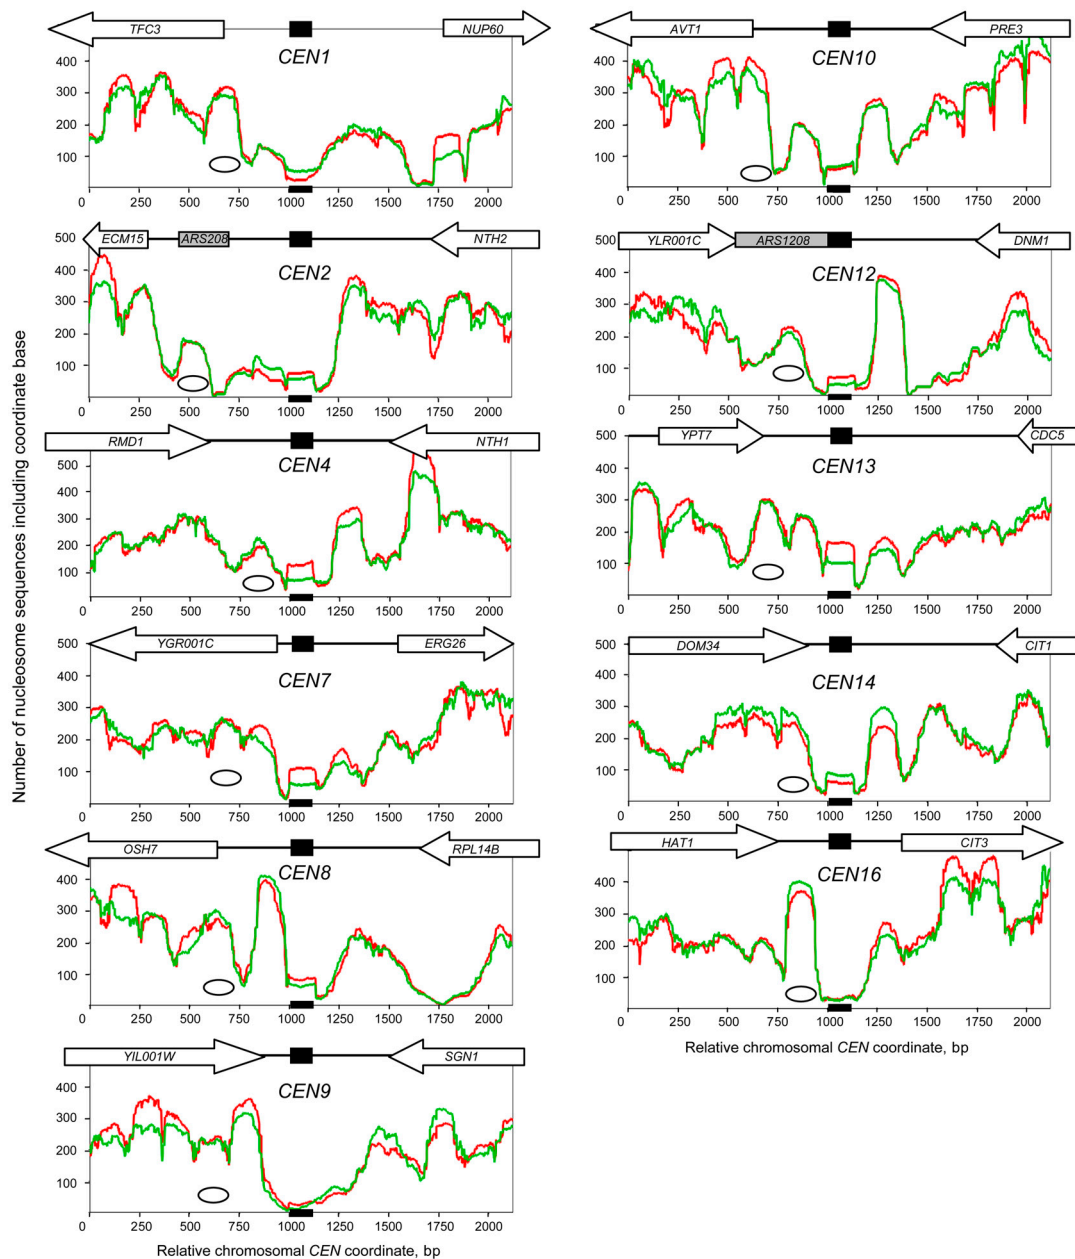

**Fig. S1.** Nucleosome occupancy profiles for all yeast centromeres not included in Fig. 2. The scale has been set arbitrarily such that the first nucleotide in CDEI in the *CEN* sequence as defined by the *Saccharomyces* Genome Database (black box) is at coordinate 1,001. Red trace: control cells; green trace: 3AT-treated cells. All nucleosome sequences were included. Raw data are shown. The data for 3AT-treated cells were multiplied by 1.27 to adjust for the different total numbers of nucleosomes sequenced for the two samples.

```

CEN2      TAAATCATCTGACTTATTTTAAATATTTAATTAACATAAAAAAGATTTTCTATTTAAATTTATT A ATTAATTTTTTCTTAAATAATTTATTTATGTTTTGTTCGAAAAGAAAAATTTTCAACA
CEN3      TAGTACAAAATAGTCACATGATGATTTTGATTTTATATATTTTAAAAAAGTAAAAATAAAAAGTAG T TTATTTTAAAAAAATAAAATTTAAAAATTTAGTGTATTTGATTTCCGAAAGTAAAAAGAAATAGT
CEN4      TTGCAAAAGTCACATGCTATAATCAACTTTTTAAAAATTTAAAAATACTTTTTATTTTATTTT TAAACATAAAATGAATAAATTTATTTATGCTTTATGATTTACCGAAACATAAAACCTTCAAGAAAGA
CEN5      AACATCAAAATTAATCACCCTGCTTTTTAAAAAATAAAATTTAATTTCAATTTTCTATTTCAATTTTAAATA A AAAATTTGAAAAATATAAAAAATTTAGCAGTATTTAGATTTCCGAAAAGAAAAAAGGTTTCAAGAA
CEN6      TTCTTTTCATCACGTGCTATAAAAAATTAATATAATTTAAATTTTTTATATAAATATAATAAATAAAAATA G AAAGTAAAAAAGAAATTAAGAAAAAATACCTTTTTGTTTTCCGAGATGTAAAATAGTTGAAAGTT
CEN7      ATATATCACGTGTTATATTTACTATAAAAAATCAATAAAATAAAACTTAGAAGATAAAAAATATA T TATACATTTTTTATTTTTATTAATTTTGTTTTTGCTTCCGAAAAGAAAAATAGTTTTTTCTA
CEN8      TAGGATGGTAAATCACATGACTATAAATCTTTTTAATTTAAATTTAATTAATAAATAAAAATATAATATACT A AATTCCTTATAAAAATGATTAACATTTGGCTTTTGTGTTCCGAACTTAGAAAAATGGTTAAGACA
CEN10     CTTAATCACGTGTTAAATAATTAATTTACTTTAAATTTATTTTTTAAATATAAAATATTTATTTCTTTT TATTTAAAAATAAAAACACAAAAAACAATGTTTATGATTTCCGAACTTAAATATACACTTTACGAG
CEN11     ATAAATCACATGATAAAAAATATTTAAAAATTTAAAAAATTAATTTTCAAAATAAATTTATAT A TTTTTTAATTAATAATCAATAATCAAAAAATAAATGTTTCAATTTCCGAACTTAAATATAGAAATGTACGA
CEN12     TAAATCACGTGTAATAAATATTTTAAAAAGTTTATAAAAATAAAATAAATTTAAATTTACTATT T TTAATAAGTTTTTATTTTTTAAATACACATTTGTTATTTGTTATCCGAACTTAAATATAGCT
CEN13     GTGACAAAATAACATGAC TACCATAAATAATTTATTTCTTTTTTAAATTTGAAAAACTAAAAAT TTTTGTGTTTTTAAAAAAGGATTTTAAATGTGATGCGTTCCGAACTTAAATATAACGTCAGCGTA
CEN14     GTTAGTCAGTGCAGTTTTTAAAAATTTTTAAACATTTAAAAAATATACATTTTATTATA T TTTTATATATTAATGTTAAAAATTTAATGATTTGCTTCCGAAAAGTAAAAATACGTTCAAAATTTGG
CEN15     TAATATCACGTGAATTATTTTGCATTTAAAAAAGTAAAAACTATTTGCTAAAATATATTTTT T AATTTTAAAAATAATGTTTTAAATTTAATTAATGATATGACTCCGAAAATATATTTTGATAACA

```

Fig. S2. Alignment of the *CEN* nucleosome kernels according to their dyad axes (i.e., the centers of the kernel sequences). Nucleotides within the *CEN* sequence are indicated in red, those outside *CEN* but within the kernel are in black and those that are outside the kernel are in gray. Nucleotides underlined in CDEI and CDEIII represent the specific binding sites of Cbf1 and CBF3 (Cep3), respectively. Fig. S2 is an expanded version of Fig. 4A, showing the entire *CEN* sequences.
